# Supplementary material for: Progesterone receptor expression contributes to gemcitabine resistance at higher ECM stiffness in breast cancer cell lines
Source: PubMed Central journal article supplement (PMC9135204; doi:10.1371/journal.pone.0268300), 2022-05-26

western blot for E cadherin  
p= plastic (excluded from figure 2)  
500 = 500Pa  
4K = 4kPa

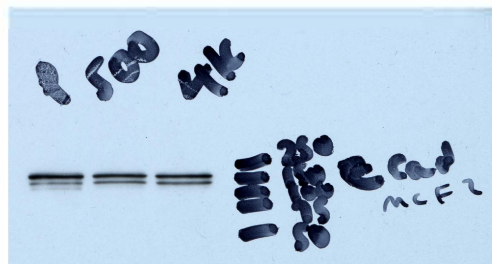

western blot for GAPDH  
plastic lane was excluded from figure 2  
500 = 500Pa  
4K = 4kPa

plastic

500

4k

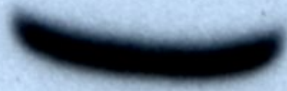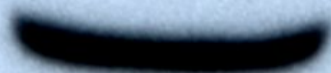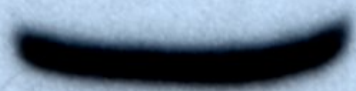

Supplement: pone.0268300.s004.pdf [file pone.0268300.s004.pdf]
